1 **Reducing the equity gap in under-5 mortality through an innovative community health program in**

2 **Ethiopia: An implementation research study**

3 Laura Drown<sup>1\*</sup>, Alemayehu Amberbir<sup>2\*‡</sup>, Alula M. Teklu<sup>3</sup>, Meseret Zelalem<sup>4</sup>, Abreham Tariku<sup>4</sup>, Yared

4 Tadesse<sup>4</sup>, Solomon Gebeyehu<sup>4</sup>, Yirdachew Semu<sup>4</sup>, Jovial Thomas Ntawukuriryayo<sup>2</sup>, Amelia

5 VanderZanden<sup>2</sup>, Agnes Binagwaho<sup>2</sup>, Lisa R. Hirschhorn<sup>5</sup>

6

7 \*Both authors contributed equally to this paper

8 ‡Corresponding author: Alemayehu Amberbir, University of Global Health Equity, Institute of Global

9 Health Equity Research (IGHER), Kigali, Rwanda. [aamberbir@ughe.org](mailto:aamberbir@ughe.org)/[aleamberbir@gmail.com](mailto:aleamberbir@gmail.com)

10

11 <sup>1</sup> Division of Global Health Equity, Brigham and Women's Hospital, Boston, MA, USA

12 <sup>2</sup> University of Global Health Equity, Kigali, Rwanda

13 <sup>3</sup> MERQ Consultancy PLC, Arbegnoch Street, Addis Ababa, Ethiopia

14 <sup>4</sup> Ministry of Health, Addis Ababa, Ethiopia

15 <sup>5</sup> Feinberg School of Medicine, Northwestern University, Chicago, IL, USA

16

17 *Email address:*

18 LD: [ldrown@bu.edu](mailto:ldrown@bu.edu)

19 AA: [aleamberbir@gmail.com](mailto:aleamberbir@gmail.com)/[aamberbir@ughe.org](mailto:aamberbir@ughe.org)

20 AMT: [amteklu@merqconsultancy.com](mailto:amteklu@merqconsultancy.com)

21 MZ: [meseret.zelalem@moh.gov.et](mailto:meseret.zelalem@moh.gov.et)

22 AT: [abraham.tariku@moh.gov.et](mailto:abraham.tariku@moh.gov.et)

23 YT: [yared.tadesse@moh.gov.et](mailto:yared.tadesse@moh.gov.et)

24 SG: [solomon.gebeyehu@moh.gov.et](mailto:solomon.gebeyehu@moh.gov.et)

25 YS: [yirdachew.semu@moh.gov.et](mailto:yirdachew.semu@moh.gov.et)

26 JTN: [tntawukuriryayo@ughe.org](mailto:tntawukuriryayo@ughe.org)

27 AV: [amyvdzd@gmail.com](mailto:amyvdzd@gmail.com)

28 AB: [abinagwaho@ughe.org](mailto:abinagwaho@ughe.org)

29 LRH: [Lisa.Hirschhorn@Northwestern.edu](mailto:Lisa.Hirschhorn@Northwestern.edu)

30

## 31 **Abstract**

### 32 *Background*

33 The Ethiopian government implemented a national community health program, the Health Extension  
34 Program (HEP), to provide community-based health services to address persisting access-related  
35 barriers to care using health extension workers (HEWs). We used implementation research to  
36 understand how Ethiopia leveraged the HEP to widely implement evidence-based interventions (EBIs)  
37 known to reduce under-5 mortality (U5M) and address health inequities.

38

### 39 *Methods*

40 This study was part of a six-country case study series using implementation research to understand how  
41 countries implemented EBIs between 2000-2015. Our mixed-methods research was informed by a  
42 hybrid implementation science framework using desk review of published and gray literature, analysis of  
43 existing data sources, and 11 key informant interviews. We used implementation of pneumococcal  
44 conjugate vaccine (PCV-10) and integrated community case management (iCCM) to illustrate Ethiopia's  
45 ability to rapidly integrate interventions into existing systems at a national level through leveraging the  
46 HEP and other implementation strategies and contextual factors which influenced implementation  
47 outcomes.

48

## 49 *Results*

50 Ethiopia implemented numerous EBIs known to address leading causes of U5M, leveraging the HEP as a  
51 platform for delivery to successfully introduce and scale new EBIs nationally. By 2014/15, estimated  
52 coverage of three doses of PCV-10 was at 76%, with high acceptability (nearly 100%) of vaccines in the  
53 community. Between 2000 and 2015, we found evidence of improved care-seeking; coverage of oral  
54 rehydration solution for treatment of diarrhea, a service included in iCCM, doubled over this period.  
55 HEWs made health services more accessible to rural and pastoralist communities, which account for  
56 over 80% of the population, with previously low access, a contextual factor that had been a barrier to  
57 high coverage of interventions.

58

## 59 *Conclusions*

60 Leveraging the HEP as a platform for service delivery allowed Ethiopia to successfully introduce and  
61 scale existing and new EBIs nationally, improving feasibility and reach of introduction and scale-up of  
62 interventions. Additional efforts are required to reduce the equity gap in coverage of EBIs including PCV-  
63 10 and iCCM among pastoralist and rural communities. As other countries continue to work towards  
64 reducing U5M, Ethiopia's experience provides important lessons in effectively delivering key EBIs in the  
65 presence of challenging contextual factors.

66

67 **Keywords:** Ethiopia, child mortality, implementation research, health extension program

68

## 69 **Background**

70 With a population of more than 112 million, Ethiopia is currently the second most populous country in  
71 Africa.<sup>1</sup> About 79% of its population resides in rural areas where communities are typically sparsely  
72 distributed.<sup>2</sup> Health inequities are reflected in notable differences in health outcomes across ethnic-

73 based regions and population groups. Under-5 mortality (U5M), an important area of focus in Ethiopia,  
74 decreased from 166 per 1,000 live births in 2000 to 67 in 2016, an impressive decline of about 59%.<sup>3</sup>  
75 However, subnational U5M rates show that this progress was not uniform across the country's nine  
76 regional states and two administrative states. In 2016, U5M rates still ranged widely from 39 per 1,000  
77 live births in Addis Ababa to 125 per 1,000 in the largely pastoralist region of Afar.<sup>3</sup> There were also  
78 differences between residence types, with U5M reported to be about 41% higher in rural areas of the  
79 country compared with urban ones.<sup>3</sup> These inequities mirror differences in coverage of many key health  
80 interventions and demonstrate that ensuring equitable access to health services for all is a major  
81 challenge in this large and diverse country.<sup>4</sup>

82  
83 In 1996, the Government of Ethiopia developed a 20-year plan under the Health Sector Development  
84 Program (HSDP), which was divided into four series of 5-year plans (HSDP-I – IV). The assessment of  
85 HSDP-I revealed that programs were not reaching the grassroots level, and called for mechanisms to  
86 improve access. The Ministry of Health (MOH) of Ethiopia invested in expansion and strengthening of its  
87 public health system to improve access to primary health care (PHC).<sup>5</sup> This health system features three  
88 tiers – the primary, secondary, and tertiary levels (Figure 1). In rural areas, the primary level includes the  
89 PHC unit, each of which consists of five health posts are under one health center, which report to one  
90 primary hospital in each *kebele* (Ethiopia's lowest administrative level). This differs in rural areas, where  
91 the primary level simply consists of one health center per *woreda* or district. The secondary and tertiary  
92 levels consist of general and six specialized hospitals, respectively.<sup>6</sup>

93  
94 In 2003/2004 the Health Extension Program (HEP) was started to improve coverage and it became part  
95 of HSDP-II.<sup>7,8</sup> This program was designed to provide community-based health services and address  
96 persisting barriers to care in rural areas.<sup>7</sup> Under the HEP, Ethiopia introduced a cadre of full-time,

97 salaried, and primarily female health extension workers (HEWs), selected by the communities they  
98 serve. HEWs complete a one-year formal training after finishing high school, which prepares them to  
99 offer an initial package of 16 services at the community level, both at a new facility type called the  
100 health post and in homes.<sup>7</sup> This broad package of services goes beyond the typical scope of community  
101 health workers in many countries to include services such as vaccination. In subsequent years following  
102 the HEP's introduction, its scope expanded to improve access to key curative health services, including  
103 treatment of diseases like malaria, pneumonia, and diarrhea that represented major causes of death in  
104 the country.<sup>7</sup> By 2009/10, the government had trained and deployed 34,482 HEWs across all regions,  
105 with HEW-to-population ratios varying widely by region.<sup>8</sup> In addition it introduced part-time Health  
106 Development Army volunteers in 2011 to support HEWs and assist in health promotion activities.<sup>9</sup>  
107  
108 Implementation research includes the study of how strategies are chosen and used to adopt and  
109 integrate evidence-based interventions (EBIs) into real-world settings. It further looks at the contextual  
110 factors which serve as facilitators or barriers to improve individual outcomes and population health.<sup>10</sup>  
111 This methodology is of particular importance in improving and sharing lessons from low- and middle-  
112 income countries (LMICs) for more effective implementation and improved progress in health  
113 outcomes.<sup>11,12</sup> Existing literature has extensively described the role of the HEP in improving coverage of  
114 health services through increased access at the community level. For example a systematic review by  
115 Assefa et al.<sup>13</sup> found that the program helped Ethiopia achieve major improvements in several key areas  
116 such as communicable diseases, maternal and child health, sanitation and hygiene, community  
117 knowledge, and health care seeking.<sup>13</sup> Other studies have reported on the contribution of the HEP in  
118 increasing access to and utilization of health services, particularly for maternal and child health.<sup>14-16</sup>  
119 However, much of the current literature on EBIs is focused on effectiveness and coverage and does not  
120 explore what was done, what worked, and implementation strategies utilized.

121

122 This paper uses data collected as part of a multi-country implementation research case series to  
123 understand successes in addressing amenable U5M deaths through implementation of health system-  
124 delivered EBIs between 2000 and 2015. We used case study methodology to understand which  
125 implementation strategies Ethiopia utilized alongside leveraging the HEP to implement U5M-targeted  
126 health system-delivered EBIs and explore contextual factors that affected the success of the strategies in  
127 achieving implementation outcomes. We use the implementation and role of the HEP in two EBIs, the  
128 pneumococcal conjugate vaccine (PCV) and integrated community case management (iCCM), to provide  
129 a deeper understanding of the processes and outcomes. The results provide transferable lessons for  
130 other countries working to accelerate their U5M reduction efforts by leveraging community-based care  
131 delivery while targeting inequity in EBI coverage.

132

### 133 **Methods**

134 This study drew from the larger six-country case study series utilizing implementation research methods  
135 to understand how countries implemented health-system delivered EBIs known to reduce amenable  
136 U5M. Details of the case study methods and our hybrid framework are reported elsewhere.<sup>17</sup> In brief,  
137 this mixed-methods implementation research was informed by a hybrid implementation science  
138 framework designed for the project to capture strategies, contextual factors, and implementation  
139 outcomes of EBI implementation for reducing U5M in LMICs (Figure 2). This framework included  
140 expansion of the Exploration, Preparation, Implementation, Sustainment Framework to include an  
141 explicit Adaptation stage (EPIAS).<sup>17,18</sup>

142

143 *Data Sources*

144 Desk Review

145 The study team undertook a review of available sources including peer-reviewed and grey literature and  
146 program documents focusing on the rates and progress of U5M and implementation of the EBIs known  
147 to reduce amenable U5M in countries (supplement Table E1). Initial searches were performed through  
148 MEDLINE (PubMed) and Google Scholar using the search terms “child mortality” or “under-5 mortality”  
149 and Ethiopia. Further searches included specific EBIs, causes of death, or contextual factors as search  
150 terms (e.g. “insecticide-treated nets,” “malaria,” or “community health workers”). Initial desk research  
151 was completed by the Strategic Analysis, Research, & Training (START) Center at the University of  
152 Washington and the study team expanded on the review through an iterative process throughout the  
153 case study as additional data sources or information gaps were identified.

154

155 We extracted existing data from sources including the Ethiopian Demographic and Health Survey (DHS,  
156 2001-2016), the World Bank, and WHO/UNICEF to measure changes in EBI coverage, U5M, and trends in  
157 health and development indicators related to U5M at the national and subnational levels between 2000  
158 and 2015.

159

160 Key Informant Interviews

161 The study team conducted 11 key informant interviews in Ethiopia reflecting a broad range of  
162 experience and viewpoints. Key informants (KIs) were chosen based on the targeted EBIs and areas  
163 where additional insight was needed from the desk review. We prioritized KIs who were able to provide  
164 information on the EPIAS stages during the period of study. Potential KIs were approached by the in-  
165 country principal investigator (AT) by telephone or email. Key informants included current and former  
166 MOH employees responsible for high-level strategic direction of the ministry or specific disease or

167 intervention areas, implementing partners, and individuals from multilateral or donor organizations who  
168 had managed partner-supported activities during the period of interest (2000-2015). We prioritized  
169 individuals active in this work during the study period but were also able to capture some experiences  
170 from the periods of 1995-1999 and 2017-2019. The interviews were conducted using a semi-structured  
171 interview guide based on the hybrid framework. All interviews were conducted in English and led by the  
172 project research associates or the in-country principal investigator, who were trained in qualitative  
173 interviewing. Interviews were audio recorded and transcribed prior to analysis.

174

#### 175 *Data Analysis*

176 We used a mixed-methods Quant-QUAL approach.<sup>18</sup> Descriptive statistics were used for EBI coverage at  
177 the national and subnational levels. We applied the framework to understand the implementation  
178 strategies, contextual factors serving as facilitators and barriers at the local, national, and global levels,  
179 and implementation outcomes from the literature. *A priori* codes for implementation strategies,  
180 outcomes, and contextual factors which were adapted and expanded as emerging codes were identified.  
181 The study team used the codes to analyze the transcripts and direct content analysis<sup>19</sup> was used to  
182 identify strategies, contextual factors, and implementation outcomes. Qualitative and quantitative data  
183 were triangulated to link the strategies, contextual factors, implementation outcomes, and coverage,  
184 and to emerge transferable lessons for other countries learning from EBI implementation in Ethiopia.

185

## 186 **Results**

### 187 *Role of Health Extension Program*

188 We found from the desk review and key informant interviews that for the majority of the targeted EBIs  
189 implemented in Ethiopia to reduce U5M the HEP was utilized as an important implementation strategy  
190 (Table 1). Ethiopia frequently leveraged the HEP as a platform for delivery of new services, with HEWs



191 playing an important role as key implementers. Service delivery by HEWs increased coverage of many  
192 EBIs compared to implementation at health facilities alone. HEWs made health services more accessible  
193 to rural and pastoralist communities that previously had low access to health facilities and services, a  
194 contextual factor that served as a barrier to high coverage of health services and interventions. This  
195 strategy of leveraging the HEP improved feasibility and reach of introduction and enabled scale up of  
196 interventions in more resource-limited and rural settings in Ethiopia by using the strong, widespread  
197 platform. Utilization of the HEP also helped Ethiopia ensure acceptability of new interventions since  
198 service delivery involved HEWs already working in communities. The strategy of embedding new  
199 interventions into the HEP additionally improved the sustainability of new interventions by building  
200 upon an existing service delivery platform rather than relying on new, vertical ones.

201  
202 In addition to direct service provision, HEP activities were designed to increase demand and uptake of  
203 maternal and child health services based at health facilities. Strategies included regular household visits,  
204 conducting community engagement and health promotion activities including sensitization to promote  
205 facility-based delivery, an EBI with very low coverage historically. Nationally, the Women Development  
206 Army cadre of volunteers were introduced into the HEP in 2011 to enhance the HEP's ability to reach  
207 households. They also helped strengthen HEP activities and improve utilization of services through  
208 demand generation activities and linking community members and HEWs.<sup>9</sup>

209  
210 We identified several other implementation strategies to introduce and scale up EBIs to reduce U5M.  
211 The most common implementation strategies Ethiopia utilized (shown in Table 2 as used for PCV and  
212 iCCM) included: national policy and development planning, leveraging and coordinating strong donor  
213 and partner support, using data for evidence-based decision-making, and integration into or leveraging  
214 of existing programs or platforms.

215

216 The HEP's role in the implementation of two EBIs, PCV and iCCM, is further described below. These two  
217 EBIs were introduced and successfully scaled to a national level during the study period to address major  
218 causes of U5M and are discussed to illustrate the role of the HEP in implementation and delivery of  
219 vaccines and curative care in Ethiopia.

220

### 221 *Pneumococcal Conjugate Vaccine*

222 The PCV-10 vaccine was introduced in late 2011 to prevent severe forms of pneumococcal disease such  
223 as pneumonia and meningitis that were previously estimated to account for up to 28% of all deaths  
224 among children under 5 in Ethiopia.<sup>20</sup> The work followed the implementation pathway of the EPIAS  
225 framework (Table 2). Exploration was followed by an intensive preparation stage typical of new vaccines  
226 in the country that included implementation strategies such as obtaining procurement support from  
227 Gavi, the Vaccine Alliance. This was leveraged through a new Pneumococcal Advance Market  
228 Commitment initiative (which served as a facilitating contextual factor by improving availability of funds  
229 targeting the new vaccine), comprehensive cascade training of health workers, and adoption of training  
230 manuals. During the preparation phase, HEWs also aided in implementation of community mobilization  
231 and advocacy activities, important implementation strategies to create demand for these vaccines.<sup>21</sup> The  
232 strategy of leveraging the HEP as a platform for service delivery allowed Ethiopia to successfully  
233 implement and scale PCV-10, supported by these other strategies. In addition to mass vaccination  
234 campaigns, a catch-up strategy to vaccinate all children under the age of 1 year was used, and the  
235 vaccine was provided through routine, free vaccination services at health facilities, including by HEWs at  
236 health posts. This provision of routine immunization services at health posts allowed new vaccines such  
237 as PCV-10 and others (such as rotavirus and pentavalent vaccines) to quickly achieve widespread  
238 implementation at a national scale and reach rural communities.

239  
240 PCV was introduced throughout the country simultaneously and with high levels of general acceptability  
241 of vaccines in the community, according to interviewees in a 2015 study.<sup>22</sup> By 2014/15, WHO/UNICEF  
242 estimated coverage of all three doses of PCV-10 to be 76%.<sup>23</sup> Despite rollout in all regions and  
243 implementation strategies targeting national reach, geographic coverage of the vaccine was not  
244 equitable, with large regional differences.<sup>3</sup> According to a key informant, these inequities reflected  
245 barrier contextual factors in differences in health system strength and governance between the regions,  
246 as well as presence of pastoralist populations in regions such as Afar and Somali. These two largely  
247 pastoralist regions had the lowest coverage of three doses of PCV reported by the 2016 DHS – 23.6%  
248 and 22.9%, respectively.<sup>3</sup> We found that other contextual factors such as limited vaccine and resource  
249 availability were also hindering factors. Conversely, availability of donor resources, government  
250 investment in health, ongoing health systems strengthening efforts, and data availability and use were  
251 facilitating factors.

252  
253 *Integrated Community Case Management of Newborn and Childhood Illness*  
254 Another important EBI introduced during the study period was community-delivered integrated  
255 management of childhood illness (IMCI), or integrated community case management (iCCM). Ethiopia  
256 previously introduced the facility-based IMCI program to address several leading causes of death in  
257 children under 5 in an integrated manner at health centers. However, the government found that access  
258 to curative child health services remained lower than expected after scale-up. In response, the MOH  
259 began adding selected curative services to the scope of existing HEWs for a more community-based  
260 delivery strategy. Ethiopia's national iCCM program formally launched in early 2010 within the HEP  
261 following pilot studies conducted by partners, an implementation strategy that generated local evidence  
262 on feasibility, and extensive preparation in collaboration with several partners. As part of iCCM, HEWs

263 provide community-level management of malaria, diarrhea, pneumonia, malnutrition, and, later,  
264 essential newborn care and management of common neonatal problems including neonatal sepsis at  
265 health posts.

266 Similar to many other EBIs implemented in Ethiopia, the program utilized a strategy of phased  
267 introduction after the pilot testing to improve feasibility of expansion given Ethiopia's geography, which  
268 was an important barrier contextual factor. ICCM was first implemented at a small scale in two of  
269 Ethiopia's nine regions and eventually scaled to the entire country. Four agrarian regions were initially  
270 targeted (Amhara, Oromia, Southern Nations, Nationalities, and People's Region (SNNPR), and Tigray)  
271 due to their greater population density and strength of HEP implementation compared with other  
272 regions. It was later scaled up throughout the country, including in pastoralist regions after development  
273 of a contextualized implementation guide for pastoralist areas. By 2014, iCCM was implemented by  
274 almost 30,000 HEWs working at 14,500 health posts in eight regions, representing 86% of the country's  
275 districts.<sup>24</sup> Notably, the program was not rolled out in the country's urban areas or two city  
276 administrations, Addis Ababa and Dire Dawa.

277

278 Though implementation of iCCM had a significant impact on geographic access to curative child health  
279 services in rural areas of the country, we identified important challenges to the program that likely  
280 limited coverage, and ultimately the program's benefits. One significant barrier contextual factor  
281 affecting coverage of services was health-seeking behavior in many areas of the country. Home visits by  
282 HEWs as part of iCCM enabled early identification of sick children and improved care-seeking behaviors;  
283 care-seeking for children with ARI symptoms and diarrhea increased by 48% and 112% respectively from  
284 2000 to 2016. ICCM introduced evidence-based management of common childhood illnesses at the  
285 community level. However, uptake remained limited, with fewer than 50% of children under 5 with  
286 acute respiratory infection symptoms or diarrhea taken to any health facility, including a health post

287 manned by HEWs, in 2016.<sup>3</sup> The 2014 Ethiopia Service Provision Assessment Plus cross-sectional survey  
288 identified additional capacity issues at health posts affecting provision of iCCM.<sup>25</sup> While availability of  
289 curative services for children under 5 was very high at health posts, overall quality of care and  
290 adherence to iCCM guidelines was found to be poor. Treatment may have been affected by weak supply  
291 chain with low availability of essential medicines required for iCCM services – zinc for treatment of  
292 diarrhea and antibiotics were both available in fewer than half of health posts assessed.<sup>26</sup> In response to  
293 stock outs of essential medicines, the program later adapted its supply chain management to use a  
294 “pull” supply chain system, or integration into the Integrated Pharmaceutical Logistic System (IPLS), that  
295 improved access to drugs at the health post level. According to a key informant, *“this adaptation*  
296 *minimized drug wastage, improved access to drugs at the health post level, and improved equity.”*

297  
298 Despite these challenges, we found evidence of improved care-seeking and coverage and equity of  
299 treatment of the conditions by the iCCM program addressed following implementation. While overall  
300 coverage increased across groups, some inequities remained. Though these services were offered for  
301 free at the health post and health center level, mitigating some financial barriers to care, children in the  
302 highest wealth quintile with diarrhea were more likely to be taken to a health facility (61%) than those in  
303 the lowest and second quintiles (40%) (Table 3b). Oral rehydration solution (ORS) for treatment of  
304 diarrhea, a service included in iCCM, doubled over the same period. A notable increase in coverage of  
305 ORS in rural areas (Table 3b) reflected overall improvement in equity. ORS use increased in all regions  
306 except Somali, where coverage declined. Despite improvement in most regions, regional differences in  
307 coverage persisted, ranging from 23.9% in Oromia to 52.5% in Benishangul-Gumuz in 2016 (Table 3b).<sup>3</sup>

308  
309 *Implementation Strategies and Contextual Factors*

310 Ethiopia's successful introduction and national scale-up of key EBIs to reduce U5M utilized various  
311 implementation strategies. One commonly used strategy was leveraging existing programs such as the  
312 HEP to implement new EBIs, an approach that improved feasibility, reach, and sustainability of new EBIs  
313 given the country's limited resources and geography. Alongside this approach, Ethiopia used several  
314 other implementation strategies, including using data for evidence-based decision-making, leveraging  
315 donor and partner resources, introducing EBIs via a phased approach, and national policy and  
316 development planning. Implementation was also impacted by cross-cutting contextual factors that  
317 served as facilitators and barriers. In Ethiopia, we found the presence of a strong community health  
318 system, other health systems strengthening efforts, data availability and use, and availability of donor  
319 and implementing partner resources were contextual factors that facilitated U5M reduction efforts. We  
320 found that, meanwhile, other contextual factors such as geography, supply chain issues, and low  
321 utilization of health services served as barriers. For many EBIs, pastoralist culture was a hindering factor  
322 affecting coverage in regions including Afar, where the majority of the population is pastoralist and U5M  
323 rates are some of the highest in the country.

324

## 325 **Discussion**

326 We found that most of the EBIs implemented in Ethiopia to reduce U5M between 2000 and 2015  
327 leveraged the HEP as an implementation strategy, using the program as a platform for delivery of new  
328 services. Ethiopia also used a number of other strategies to successfully implement and scale up many of  
329 the existing and new EBIs, although gaps remained in coverage and in fidelity.

330

331 Prior studies have reported on the contribution of the HEP in increasing access and uptake of health  
332 services, including maternal and child health.<sup>13-16</sup> They have also found that the program helped Ethiopia  
333 achieve improvements in areas such as maternal and child health, communicable diseases, and

334 sanitation and hygiene.<sup>13</sup> The contributions of this paper allow us to better understand some of the  
335 mechanisms through which this strategy worked and other implementation strategies that were used  
336 alongside the HEP to implement EBIs and contextual factors that affected their success. For example,  
337 implementation strategies such as use of data for evidence-based decision-making and leveraging donor  
338 and partner resources were beneficial in introducing and scaling up interventions. Implementation of  
339 PCV and iCCM were impacted, however, by contextual factors such as geography, supply chain  
340 challenges, and care-seeking behavior.

341  
342 Similar to our findings on iCCM, a study on the assessment of success and challenges of HEP in Ethiopia  
343 between 2003 to 2018 found readiness and availability of services including staffing, equipment, and  
344 adequate supplies at the health post level where the HEP operates and service utilization were key  
345 barriers for the successful implementation various EBIs by HEWs.<sup>13</sup>

346  
347 Literature on CHW programs in other LMICs is abundant. As in Ethiopia, CHW programs in countries  
348 including Brazil, Nepal, and Iran have increased access to health services in rural areas and contributed  
349 to improved outcomes in these areas.<sup>27-30</sup> CHW programs often share the HEP's challenges, such as  
350 those related to supply chain in Zambia and Pakistan or community care-seeking preferences in India.<sup>30-</sup>

351 <sup>32</sup> Literature shows comparative strengths of the HEP that have likely contributed to the program's  
352 success. For example, Accredited Social Health Activists (ASHAs) in India conduct activities like that of  
353 HEWs but are considered part-time volunteers. While HEWs are full time and salaried, ASHAs are  
354 reported to be dissatisfied with remuneration as they are only paid for a select few interventions in their  
355 wide scope.<sup>32</sup> CHW training in some countries such as Pakistan and Zimbabwe has been reported to be  
356 inadequate, though this is a strength in Ethiopia where HEWs receive more than a year of pre-service  
357 training.<sup>31,33</sup>

358

359 Ethiopia provides a valuable example for other low-resource settings in its utilization of a community  
360 health program to improve access to both preventive and curative EBIs. Some countries have not yet  
361 adopted a similar approach of utilizing CHWs to provide very decentralized and comprehensive services  
362 at the community level. Ethiopia's implementation strategies demonstrate the importance of building  
363 upon existing, widespread programs to introduce new EBIs more feasibly at a large scale or to further  
364 expand access and reach of existing ones. It has been well documented that the HEP enabled Ethiopia to  
365 improve critical health outcomes in areas of maternal and child health, communicable diseases, hygiene  
366 and sanitation, knowledge, and increasing health care-seeking behavior.<sup>13</sup>

367

368 The experience of Ethiopia also demonstrates the importance of efforts to adapt strategies or introduce  
369 new ones to encourage uptake and ensure equity of coverage of services offered at the community level  
370 reflecting subnational variability in geography, culture, and other contextual factors. Establishment and  
371 expansion of the HEP was a key strategy to improve access to health services at the community level,  
372 particularly in Ethiopia's vast rural and pastoralist areas with historically low access to health facilities.  
373 There is also evidence of pro-poor public spending on health in Ethiopia which supported the  
374 implementation of EBIs by the HEP.<sup>13</sup> The Ethiopian government allocated nearly 60% of health  
375 expenditures at health centers which supports the work of the HEP.<sup>34</sup>

376

377 The challenges we identified in implementation were similar to contextual barriers described elsewhere.  
378 A systematic review of the HEP similarly highlighted the role of the HEP in improving maternal and child  
379 health services at the health center and community levels.<sup>13</sup> However, remaining challenges include  
380 capacity of health posts related to supplies, variation in performance of HEWs across geography, work  
381 overload, and contextual factors related to the wider health system issues.<sup>13</sup> For facility-based services,



382 HEWs played a role in promoting care-seeking. A similar role was adopted by Health Development Army  
383 volunteers in 2011 as an adaptation to the HEP. Since uptake may be related to perceived quality of  
384 community-level care, ensuring high quality of care within community health programs should be a  
385 priority for countries leveraging them. Ethiopia used a system of supportive supervision during  
386 implementation of many EBIs to improve fidelity, a strategy that may be valuable in many settings.  
387 However, quality of care remains an area for improvement that became a priority area for the national  
388 Health Sector Transformation Plan.<sup>35</sup> Coverage of many EBIs, even ones such as ORS with expanded  
389 community-level access during the study period, still varies greatly by region, residence type, and wealth  
390 quintile in Ethiopia. This is an ongoing challenge that other countries are likely to face and should  
391 consider during planning and preparation of implementation.

392  
393 Our study must be interpreted in light of its limitations. This case study is limited by the fact that publicly  
394 available data, reports, and publications often do not describe the implementation outcomes of interest  
395 at a subnational level, and data often are either reported at a national level or for a specific subnational  
396 population. This was a retrospective study that relied on recall for critical qualitative components, with  
397 the corresponding risk of recall bias.

## 398 399 **Conclusions**

400 As LMICs work towards further reducing child mortality, existing community health programs represent  
401 a valuable opportunity for introduction and expansion of new EBIs. Ethiopia utilized a strong,  
402 widespread community health program, the Health Extension Program, to implement new EBIs,  
403 including the pneumococcal vaccine and integrated community case management. Leveraging the HEP  
404 as a platform for service delivery allowed Ethiopia to successfully introduce and scale new and existing  
405 EBIs nationally. Further effort is required to reduce the equity gap in coverage of EBIs among pastoralist

406 and rural communities. Ethiopia’s work in utilizing the HEP alongside other implementation strategies to  
407 effectively deliver key EBIs in the presence of potentially challenging contextual factors provides  
408 important lessons for other countries aiming to reduce under-5 mortality.

409

410

#### 411 **Declarations**

##### 412 *Ethics approval and consent to participate*

413 The study was reviewed by the Institutional Review Board in Ethiopia (Approval number PM23/281). All  
414 KIs provided informed consent before interviews were conducted. The overall project was also reviewed  
415 by the Rwanda National Ethics Committee and Northwestern University and determined to be non-  
416 human-subjects research.

417

##### 418 *Consent for publication*

419 Not applicable

420

##### 421 *Data availability*

422 The datasets used and/or analyzed during the current study are available from the corresponding author  
423 on reasonable request.

424

##### 425 *Competing interests*

426 The authors declare that they have no competing interests.

427

##### 428 *Funding*

429 This work was completed as part of a larger case study series funded by the Bill & Melinda Gates  
430 Foundation and Gates Ventures. These funding bodies were not directly involved in the development of  
431 this manuscript.

432

#### 433 *Authors' contributions*

434 LD, AMT, AB, and LRH made substantial contributions to the design of this work.

435 LD, AA, JTN, AMT, AB, and LRH contributed to the data analysis.

436 LD, AA, AMT, MZ, AT, YT, SG, YS, JTN, AV, AB, and LRH interpreted the results to form the manuscript.

437 LD, AA, AMT, MZ, AT, YT, SG, YS, JTN, AV, AB, and LRH contributed to writing and revision of the  
438 manuscript. All authors have approved the final version.

439

#### 440 *Acknowledgements*

441 We would like to acknowledge and thank the key informants and other stakeholders in Ethiopia who  
442 provided essential information, historical perspectives and narratives, and feedback on our findings,  
443 ensuring we captured accurate reflection possible on Ethiopia's journey to reducing under-5 mortality.

444

#### 445 **References**

- 446 1. Bank W. Urban population (% of total population) - Ethiopia. 2018.  
447 <https://data.worldbank.org/indicator/SP.URB.TOTL.IN.ZS?locations=ET>. Accessed 26 Apr 2021.
- 448 2. Bank. W. Rural population (% of total population) – Ethiopia.  
449 <https://data.worldbank.org/indicator/SP.RUR.TOTL.ZS?locations=ET>. Accessed 26 Apr 2021. 2018.
- 450 3. USAID. STATcompiler. <https://www.statcompiler.com/en/>. Accessed 24 Mar2021.
- 451 4. Faye CM, Wehrmeister FC, Melesse DY, et al. Large and persistent subnational inequalities in  
452 reproductive, maternal, newborn and child health intervention coverage in sub-Saharan Africa. *BMJ Global Health*  
453 2020; 5(1): e002232.
- 454 5. Teshome SB, Hoebink P. Aid, ownership, and coordination in the health sector in Ethiopia. *Development*  
455 *Studies Research* 2018; 5(sup1): S40-S55.
- 456 6. Annis E, Ratcliffe H. Ethiopia. Primary Health Care Performance Initiative.  
457 <https://improvingphc.org/ethiopia>. Accessed 9 Sept 2022.
- 458 7. Admassu M CN, Hailu L, Jones T, Muther K, Panjabi R, Price M. Community Health Workers in Ethiopia.  
459 Exemplars in Global Health. 2020; Retrieved from [https://www.exemplars.health/topics/community-health-](https://www.exemplars.health/topics/community-health-workers/ethiopia)  
460 [workers/ethiopia](https://www.exemplars.health/topics/community-health-workers/ethiopia).
- 461 8. Damtew ZA CC, Moges AS. The Health Extension Program of Ethiopia: Strengthening the community  
462 health system. Harvard Health Policy Review. 2016; Retrieved from

- 463 <http://www.hhpronline.org/articles/2016/12/17/the-health-extension-program-of-ethiopia>.
- 464 9. Wang H, Tesfaye R, Ramana GNV, Chekagn CT. Ethiopia Health Extension Program: An Institutionalized  
465 Community Approach for Universal Health Coverage; 2016.
- 466 10. United States Department of Health and Human Services. Dissemination and Implementation Research in  
467 Health (R03) [Internet]. Available from: <https://grants.nih.gov/grants/guide/pa-files/par-13-056.html>  
468 .
- 469 11. Alonge O, Rodriguez DC, Brandes N, Geng E, Reveiz L, Peters DH. How is implementation research applied  
470 to advance health in low-income and middle-income countries? *BMJ Global Health* 2019; **4**(2): e001257.
- 471 12. Gimbel S, Mwanza M, Nisingizwe MP, Michel C, Hirschhorn L, Collaborative APP. Improving data quality  
472 across 3 sub-Saharan African countries using the Consolidated Framework for Implementation Research (CFIR):  
473 results from the African Health Initiative. *BMC Health Serv Res* 2017; **17**(Suppl 3): 828-.
- 474 13. Assefa Y, Gelaw YA, Hill PS, Taye BW, Van Damme W. Community health extension program of Ethiopia,  
475 2003-2018: successes and challenges toward universal coverage for primary healthcare services. *Global Health*  
476 2019; **15**(1): 24.
- 477 14. Admassie A, Abebaw D, Woldemichael AD. Impact evaluation of the Ethiopian Health Services Extension  
478 Programme. *Journal of Development Effectiveness* 2009; **1**(4): 430-49.
- 479 15. Yitayal M, Berhane Y, Worku A, Kebede Y. The community-based Health Extension Program significantly  
480 improved contraceptive utilization in West Gojjam Zone, Ethiopia. *J Multidiscip Healthc* 2014; **7**: 201-8.
- 481 16. Medhanyie A, Spigt M, Kifle Y, et al. The role of health extension workers in improving utilization of  
482 maternal health services in rural areas in Ethiopia: a cross sectional study. *BMC Health Serv Res* 2012; **12**(1): 352.
- 483 17. Hirschhorn LR, Frisch M, Ntawukuriryayo JT, et al. Development and application of a hybrid  
484 implementation research framework to understand success in reducing under-5 mortality in Rwanda. *Gates Open*  
485 *Res* 2021; **5**: 72.
- 486 18. Aarons GA, Hurlburt M, Horwitz SM. Advancing a conceptual model of evidence-based practice  
487 implementation in public service sectors. *Adm Policy Ment Health* 2011; **38**(1): 4-23.
- 488 19. Hsieh HF, Shannon SE. Three approaches to qualitative content analysis. *Qual Health Res* 2005; **15**(9):  
489 1277-88.
- 490 20. MOH. Introducing pneumococcal conjugate vaccine in Ethiopia. Training Manual for Health Workers.  
491 Ministry of Health, Ethiopia. [https://www.medbox.org/countries/introducing-pneumococcal-conjugatevaccine-in-](https://www.medbox.org/countries/introducing-pneumococcal-conjugatevaccine-in-ethiopia-training-manual-for-health-workers/preview)  
492 [ethiopia-training-manual-for-health-workers/preview](https://www.medbox.org/countries/introducing-pneumococcal-conjugatevaccine-in-ethiopia-training-manual-for-health-workers/preview). 2011; Accessed 29 May 2021.
- 493 21. GAVI. Proposal for NVS-Pneumo support: Ethiopia. Global Alliance for Vaccines and Immunization.  
494 <https://www.gavi.org/news/document-library/proposal-nvs-pneumo-support-ethiopia>. Accessed 5 Jan 2020.
- 495 22. Molla M, Burchett H, Mounier-Jack S, Belete H, Kitaw Y. New vaccine adoption and decision making in  
496 Ethiopia: Qualitative study of national decision-making processes for the introduction of PCV 10. *The Ethiopian*  
497 *Journal of Health Development* 2017; **29**(1).
- 498 23. Ethiopia: WHO and UNICEF estimates of immunization coverage. WHO/UNICEF. 2019.  
499 [https://www.who.int/immunization/monitoring\\_surveillance/data/eth.pdf](https://www.who.int/immunization/monitoring_surveillance/data/eth.pdf). Accessed 3 Mar 2022.
- 500 24. Integrated Community Case Management- iCCM/ Story in Ethiopia. In: Evidence Review Symposium.  
501 Accra, Ghana; 2014. [https://www.childhealthtaskforce.org/sites/default/files/2019-07/iCCM](https://www.childhealthtaskforce.org/sites/default/files/2019-07/iCCM_Symposium_presentation_iCCM_in_Ethiopia%28MOH_Ethiopia%2C_2014%29.pdf) Symposium  
502 presentation\_iCCM in Ethiopia%28MOH Ethiopia%2C 2014%29.pdf. Accessed 5 Jan 2020.
- 503 25. EPHI, MOH, ICF International. Ethiopia Service Provision Assessment (SPA) Plus Survey. Addis Ababa,  
504 Ethiopia; Rockville, Maryland, USA; 2014. [https://www.ephi.gov.et/images/pictures/FINAL](https://www.ephi.gov.et/images/pictures/FINAL_draft_SPA+REPORT_survey_tools_adjusted_-_Dec_24_2015.pdf) draft SPA+REPORT  
505 survey tools adjusted – Dec 24 2015.pdf. Accessed 20 Nov 2019.
- 506 26. Chandani Y, Andersson S, Heaton A, et al. Making products available among community health workers:  
507 Evidence for improving community health supply chains from Ethiopia, Malawi, and Rwanda. *Journal of global*  
508 *health* 2014; **4**(2): 020405-.
- 509 27. Rocha R, Soares RR. Evaluating the Impact of Community-Based Health Interventions: Evidence from  
510 Brazil's Family Health Program. *Health Econ*. 2010; doi: 10.1002/hec.1607.
- 511 28. Pratap N. Technical consultation on the role of community based providers in improving maternal and  
512 neonatal health. Community Health Workers Meeting; 2012; Amsterdam, Netherlands.
- 513 29. Mehryar AH, Aghajanian A, Ahmad-Nia S, Mirzae M, Naghavi M. Primary health care system, narrowing of  
514 rural-urban gap in health indicators, and rural poverty reduction: the experience of Iran. XXV General Population  
515 Conference of the International Union for the Scientific Study of Population; 2005; Tours, France.

516 30. Worku Y, Shelley KD, Clinton Health Access Initiative. Community Health Assistant Process Evaluation.  
 517 Lusaka, Zambia; 2013.  
 518 31. Global Health Workforce Alliance. Pakistan. 2012. Available at:  
 519 <http://www.who.int/workforcealliance/countries/pak/en/index.html>. Accessed 18 Aug 2021.  
 520 32. Bajpai N, Dholakia RH. Improving the Performance of Accredited Social Health Activists in India: Working  
 521 Paper No. 1. Mumbai, India: Columbia Global Centers, South Asia, Columbia University; 2011.  
 522 33. Zimbabwe MOHCW. The Zimbabwe Health Sector Investment Case (2010-2012): Accelerating Progress  
 523 towards the Millennium Development Goals. Harare, Zimbabwe; 2010. Available at:  
 524 [http://www.unicef.org/esaro/Health\\_Investment\\_Case\\_Report1.pdf](http://www.unicef.org/esaro/Health_Investment_Case_Report1.pdf).  
 525 34. Hailu A, Gebreyes R, Norheim OF. Equity in public health spending in Ethiopia: a benefit incidence  
 526 analysis. *Health Policy and Planning* 2021; **36**(Supplement\_1): i4-i13.  
 527 35. Federal Democratic Republic of Ethiopia. Health Sector Transformation Plan 2015/16 – 2019/2020. Addis  
 528 Ababa: Ministry of Health; 2015.  
 529  
 530

531 Figure 1: Ethiopia’s three-tiered public health care system

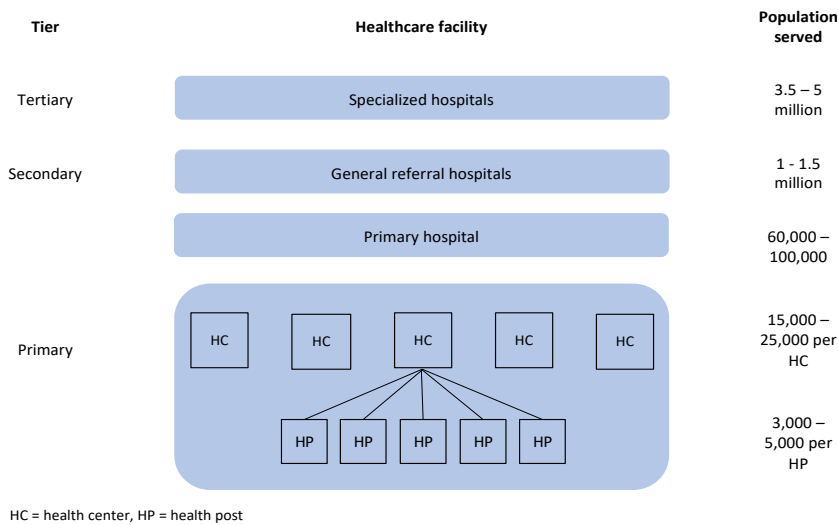

532

533

534

535

536

537

538

539 Figure 2: Implementation research framework for understanding evidence-based interventions to  
 540 reduce under-5 mortality (Hirschhorn, L. R., et al, Gates Open Research, 2021;5,72)  
 541

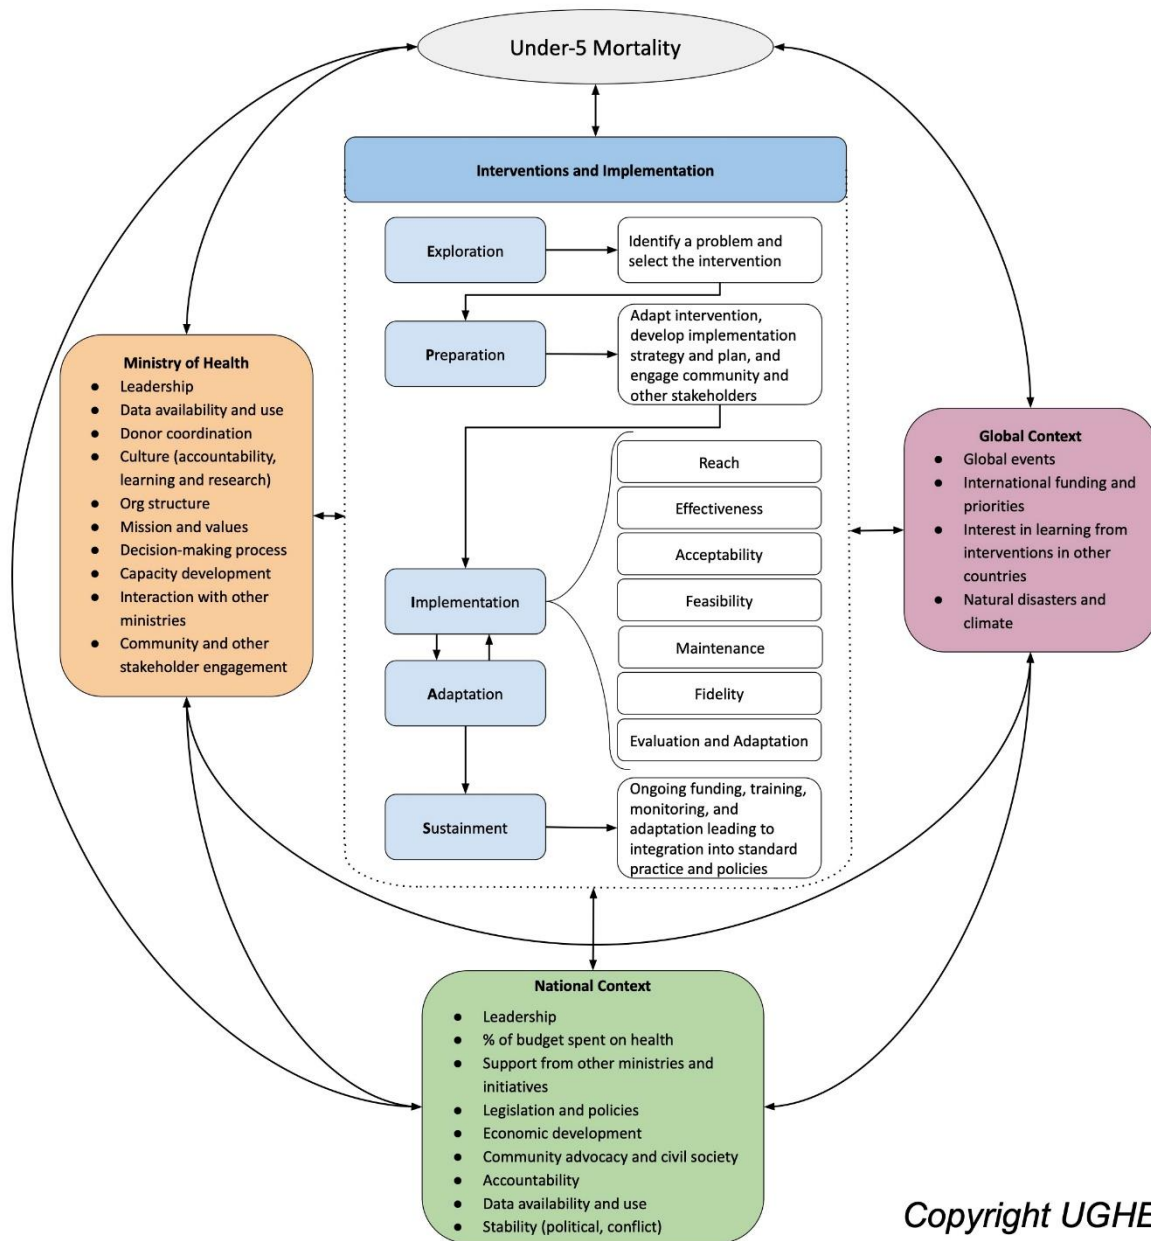

Copyright UGHE

542  
543

Table 1: List of Evidence-Based Interventions Studied and Use of Health Extension Program

| Area of focus                      | Evidence-based intervention                                         | Health Extension Program utilized |
|------------------------------------|---------------------------------------------------------------------|-----------------------------------|
| Pneumonia<br>Diarrhea<br>Malaria   | Facility-based integrated management of childhood illness (FB-IMCI) | x                                 |
|                                    | Integrated community case management (iCCM)                         | x                                 |
|                                    | Oral rehydration solution (ORS) and zinc                            | x                                 |
|                                    | Rotavirus vaccination                                               | x                                 |
|                                    | Pneumococcal vaccination                                            | x                                 |
|                                    | <i>Haemophilus influenzae</i> type B vaccination                    | x                                 |
|                                    | Insecticide-treated nets                                            | x                                 |
|                                    | Indoor residual spraying                                            | x                                 |
| Other vaccine-preventable diseases | Measles vaccination                                                 | x                                 |
|                                    | Meningococcal vaccination                                           | x                                 |
| Human immunodeficiency virus (HIV) | Prevention of mother-to-child transmission of HIV                   | x                                 |
|                                    | Early infant diagnosis and treatment of HIV                         | x                                 |
| Nutrition                          | Management of severe acute malnutrition                             | x                                 |
|                                    | Vitamin A supplementation                                           | x                                 |
| Neonatal period                    | Improving access to antenatal care                                  | x                                 |
|                                    | Management of pregnancy-associated hypertensive disorders           |                                   |
|                                    | Maternal tetanus vaccination                                        |                                   |
|                                    | Facility-based delivery and skilled birth attendance                | x                                 |
|                                    | Basic and comprehensive obstetric and newborn care                  |                                   |
|                                    | Caesarean section                                                   |                                   |
|                                    | Clean delivery practice                                             | x                                 |
|                                    | Corticosteroids for preterm labor                                   |                                   |
|                                    | Active management of delivery                                       |                                   |
|                                    | Neonatal resuscitation                                              |                                   |
|                                    | Neonatal intensive care units                                       |                                   |
|                                    | Kangaroo mother care                                                |                                   |
|                                    | Management of neonatal sepsis                                       | x                                 |
| Post-partum visits                 | x                                                                   |                                   |

Table 2: Selected Contextual Factors, Implementation Strategies, and Role of Health Extension Program

| Evidence-based intervention                 | Contextual factors                                                                                                                                                                                                                                                                                                                                                                              | Implementation strategies utilized                                                                                                                                                                                                                                                                                                                                                                                                                                                                                                                                                                                                                                                                                                                                         | Role of Health Extension Program (HEP)                                                                                                                                                                                                                                                                                                          |
|---------------------------------------------|-------------------------------------------------------------------------------------------------------------------------------------------------------------------------------------------------------------------------------------------------------------------------------------------------------------------------------------------------------------------------------------------------|----------------------------------------------------------------------------------------------------------------------------------------------------------------------------------------------------------------------------------------------------------------------------------------------------------------------------------------------------------------------------------------------------------------------------------------------------------------------------------------------------------------------------------------------------------------------------------------------------------------------------------------------------------------------------------------------------------------------------------------------------------------------------|-------------------------------------------------------------------------------------------------------------------------------------------------------------------------------------------------------------------------------------------------------------------------------------------------------------------------------------------------|
| Pneumococcal conjugate vaccine              | <ul style="list-style-type: none"> <li>• Donor resources (+)</li> <li>• Investment in health (+)</li> <li>• Strong community health system (+)</li> <li>• Ongoing health systems strengthening efforts (+)</li> <li>• Data availability and use (+)</li> <li>• Geography and inequity of coverage across regions (-)</li> <li>• Limited vaccine and resource availability (-)</li> </ul>        | <ul style="list-style-type: none"> <li>• Data use for decision-making and local data generation</li> <li>• Government co-financing</li> <li>• Stakeholder engagement</li> <li>• Community engagement and social mobilization activities</li> <li>• Introduction via phased approach prioritizing high-risk areas</li> <li>• Utilization of donor and partner resources</li> <li>• Systems assessment and strengthening</li> <li>• Adaptation for local context</li> <li>• Training and supportive supervision (cascaded)</li> <li>• Mass vaccination campaigns with follow-up campaigns every five years</li> <li>• Integration into routine vaccine schedule</li> <li>• Translation of advocacy, communication, and educational materials into local languages</li> </ul> | <ul style="list-style-type: none"> <li>• Vaccine provided by HEWs at health posts as part of routine vaccination</li> <li>• Implementation of community engagement and social mobilization activities in communities</li> </ul>                                                                                                                 |
| Integrated community case management (iCCM) | <ul style="list-style-type: none"> <li>• Effective national leadership and control (+)</li> <li>• Donor and implementing partner resources (+)</li> <li>• Strong community health system (+)</li> <li>• Data availability and use (+)</li> <li>• Geography and inequity of coverage across regions (-)</li> <li>• Low utilization of health services (-)</li> <li>• Supply chain (-)</li> </ul> | <ul style="list-style-type: none"> <li>• Integration into existing program</li> <li>• Leveraging and coordination of donor and partner support</li> <li>• Data use for decision-making</li> <li>• National policy and development planning</li> <li>• Utilization of supportive supervision</li> <li>• Adaptive management</li> <li>• Monitoring and evaluation</li> <li>• Decentralization and standardization of training curriculum within existing HEW training program</li> <li>• Quality improvement activities</li> <li>• Adaptation to include major causes of death and meet needs of neonatal mortality</li> <li>• Initial introduction in four regions</li> </ul>                                                                                               | <ul style="list-style-type: none"> <li>• iCCM implemented within existing HEP</li> <li>• Care delivery by HEWs at health posts</li> <li>• iCCM integrated into pre-service training for HEWs</li> <li>• Use of health development army volunteers to generate demand for iCCM services and link community members with HEWs for care</li> </ul> |

(+) = facilitator, (-) = barrier; HEW = health extension worker



Table 3a: Coverage of Integrated Community Case Management (iCCM) Interventions by Region

| Intervention                               | Addis Ababa |      | Afar |      | Amhara |      | Ben.-Gumuz |      | Dire Dawa |      | Gambella |      | Harari |      | Oromia |      | Somali |      | SNNPR |      | Tigray |      | National |      |
|--------------------------------------------|-------------|------|------|------|--------|------|------------|------|-----------|------|----------|------|--------|------|--------|------|--------|------|-------|------|--------|------|----------|------|
|                                            | 2000        | 2016 | 2000 | 2016 | 2000   | 2016 | 2000       | 2016 | 2000      | 2016 | 2000     | 2016 | 2000   | 2016 | 2000   | 2016 | 2000   | 2016 | 2000  | 2016 | 2000   | 2016 | 2000     | 2016 |
| U5 with ARI symptoms taken to facility (%) | 58.4        |      | 21.9 | 53.1 | 11.5   | 28.1 | 28.0       |      | 33.1      |      | 41.3     |      | 40.5   |      | 16.6   | 30.2 | 49.4   |      | 15.4  | 45.4 | 12.3   | 36.7 | 21.3     | 31.6 |
| U5 with diarrhea taken to facility (%)     | 31.1        | 54.4 | 15.4 | 58.9 | 10.8   | 41.0 | 25.2       | 64.7 | 25.9      | 66.4 | 31.4     | 65.4 | 29.9   | 61.5 | 12.5   | 45.9 | 42.3   | 45.5 | 13.2  | 50.5 | 17.1   | 52.6 | 21.1     | 44.8 |
| ORS for diarrhea treatment (%)             | 40.1        | 49.1 | 23.6 | 35.8 | 9.0    | 24.1 | 13.4       | 52.5 | 25.9      | 50.6 | 32.6     | 43.3 | 26.2   | 44.3 | 12.9   | 23.9 | 50.5   | 46.2 | 13.0  | 34.3 | 15.3   | 43.5 | 13.1     | 19.5 |

ARI = acute respiratory infection, ORS = oral rehydration solution, U5 = under-5

Table 3b: Coverage of Integrated Community Case Management (iCCM) Interventions by Sex, Residence, and Wealth Quintile

| Intervention                                           | Sex  |      |          |        |      |          | Residence |      |          |       |      |          | Wealth Quintile |      |          |         |      |          |
|--------------------------------------------------------|------|------|----------|--------|------|----------|-----------|------|----------|-------|------|----------|-----------------|------|----------|---------|------|----------|
|                                                        | Male |      |          | Female |      |          | Urban     |      |          | Rural |      |          | Lowest          |      |          | Highest |      |          |
|                                                        | 2000 | 2016 | % change | 2000   | 2016 | % change | 2000      | 2016 | % change | 2000  | 2016 | % change | 2000            | 2016 | % change | 2000    | 2016 | % change |
| U5 with ARI symptoms taken to facility or provider (%) | 22.3 | 34.1 | +54.3    | 20.2   | 29.1 | +44.1    | 48.1      | 64.4 | +33.9    | 19.3  | 29.2 | +51.3    | 11.5            | 25.0 | +117.4   | 39.3    | 44.2 | +12.5    |
| U5 with diarrhea taken to facility (%)                 | 23.6 | 41.5 | +75.8    | 18.4   | 48.4 | +163.0   | 48.4      | 60.9 | +25.8    | 18.9  | 42.9 | +127.0   | 22.1            | 40.1 | +81.4    | 39.2    | 61.1 | +55.9    |

|                                |      |      |        |      |      |        |      |      |       |      |      |        |     |      |        |      |      |       |
|--------------------------------|------|------|--------|------|------|--------|------|------|-------|------|------|--------|-----|------|--------|------|------|-------|
| ORS for diarrhea treatment (%) | 13.3 | 30.2 | +127.1 | 12.8 | 28.8 | +125.0 | 47.3 | 40.5 | -14.4 | 10.3 | 28.3 | +174.8 | 8.2 | 26.7 | +225.6 | 33.2 | 41.4 | +24.7 |
|--------------------------------|------|------|--------|------|------|--------|------|------|-------|------|------|--------|-----|------|--------|------|------|-------|

*ARI = acute respiratory infection, ORS = oral rehydration solution, U5 = under-5*
